# Supplementary material for: A nonrandomized cohort and a randomized study of local control of large hepatocarcinoma by targeting intratumoral lactic acidosis
Source: eLife. 2016 Aug 2;5:e15691. doi: 10.7554/eLife.15691 (PMC4970867; doi:10.7554/eLife.15691)
Supplement: Figure 1—source data 1. [file elife-15691-fig1-data1.xlsx]

## Sheet: Sheet1
	Source file of Figure 1
	Patient No.	Treatment	Tumor volume before TACE /mL	Viable tumor volume before TACE /mL	Viable tumor volume after TACE/ mL	Viable Tumor residues of each patient /%
	C01	cTACE	693.58	630.865	136.815	21.6869
	C02		635.175	610.215	451.395	73.9731
	C03		104.59	88.47	41.595	47.0159
	C04		846.585	697.715	1510.63	216.511
	C05		620.36	612.335	325.98	53.2356
	C06		1040.75	997.5	875.59	87.7784
	C07		87.605	78.465	13.955	17.785
	C08		730.625	730.625	754.64	103.287
	C09		96.25	93.595	4.775	5.10177
	C10		1611.94	1584.38	1125.34	71.0274
	C11		486.396	486.396	247.376	50.859
	C12		179.293	179.293	181.294	101.116
	C13		698.727	695.693	711.765	102.31
	C14		644.357	612.442	113.356	18.5089
	C15		119.44	108.908	223.846	205.537
	C16		1252.68	1183.63	36.737	3.10376
	C17		355.424	355.424	207.148	58.2819
	C18		627.975	621.993	1190.64	191.424
	C19		477.274	462.71	84.446	18.2503
	C20		749.356	741.168	209.087	28.2105
	C21		330.479	328.584	175.156	53.3063
	C22		370.321	367.097	245.566	66.894
	C23		72.246	69.022	28.884	41.8475
	C24		473.423	465.855	123.46	26.5018
	C25		767.238	746.575	554.075	74.2156
	C26		98.959	72.848	22.593	31.0139
	C27		510.088	482.575	132.421	27.4405
	T01	TILA-TACE	94.911	87.128	0	0
	T02		916.823	858.294	151.989	17.7083
	T03		86.541	86.541	16.473	19.0349
	T04		1022.57	1018.48	165.929	16.2918
	T05		686.866	666.226	88.99	13.3573
	T06		289.194	259.571	0	0
	T07		395.067	395.067	109.526	27.7234
	T08		476.68	441.844	121.27	27.4463
	T09		817.008	714.241	106.194	14.8681
	T10		437.044	437.044	17.633	4.03461
	T11		149.335	134.223	6.156	4.5864
	T12		90.355	90.355	3.484	3.8559
	T13		1328.91	1328.91	0	0
	T14		795.746	756.248	48.134	6.36484
	T15		97.99	97.99	11.537	11.7737
	T16		430.57	423.24	42.281	9.99
	T17		202.266	202.266	35.556	17.5788
	T18		100.093	100.093	43.243	43.2028
	T19		59.736	59.736	13.913	23.2908
	T20		135.79	115.283	0	0
	T21		227.336	225.693	10.562	4.67981
	T22		215.665	202.027	28.041	13.8798
	T23		1224.57	1203.55	0	0
	T24		386.892	335.983	57.446	17.0979
	T25		364.211	348.771	13.826	3.96421
	T26		93.712	93.712	38.756	41.3565
	T27		174.616	103.56	0	0
	T28		842.971	842.971	0	0
	T29		1099.96	1099.96	124.53	11.3213
	T30		311.462	311.462	77.112	24.7581
