# Supplementary material for: A nonrandomized cohort and a randomized study of local control of large hepatocarcinoma by targeting intratumoral lactic acidosis
Source: eLife. 2016 Aug 2;5:e15691. doi: 10.7554/eLife.15691 (PMC4970867; doi:10.7554/eLife.15691)
Supplement: Figure 2—source data 1. [file elife-15691-fig2-data1.xlsx]

## Sheet: Sheet1
	Source file of Figure 2C
	Tumor No.	Treatment	Tumor volume before TACE /mL	Viable tumor volume before TACE /mL	Viable tumor volume after TACE/ mL	Response to treatment
	C01	cTACE	693.58	630.865	136.815	PR(10%<Viable<50%)
	C02		635.175	610.215	451.395	SD
	C03		104.59	88.47	41.595	PR(10%<Viable<50%)
	C04		846.585	697.715	1510.63	PD
	C05		620.36	612.335	325.98	SD
	C06		1040.75	997.5	875.59	SD
	C07		87.605	78.465	13.955	PR(10%<Viable<50%)
	C08		730.625	730.625	754.64	PD
	C09		96.25	93.595	4.775	PR(Viable<10%)
	C10		1611.94	1584.38	1125.34	SD
	C11		486.396	486.396	247.376	SD
	C12		179.293	179.293	181.294	PD
	C13		698.727	695.693	711.765	PD
	C14		644.357	612.442	113.356	PR(10%<Viable<50%)
	C15		119.44	108.908	223.846	PD
	C16		1252.68	1183.63	36.737	PR(Viable<10%)
	C17		355.424	355.424	207.148	SD
	C18		627.975	621.993	1190.64	PD
	C19		477.274	462.71	84.446	PR(10%<Viable<50%)
	C20		749.356	741.168	209.087	PR(10%<Viable<50%)
	C21		330.479	328.584	175.156	SD
	C22		370.321	367.097	245.566	SD
	C23		72.246	69.022	28.884	PR(10%<Viable<50%)
	C24		473.423	465.855	123.46	PR(10%<Viable<50%)
	C25		767.238	746.575	554.075	SD
	C26		98.959	72.848	22.593	PR(10%<Viable<50%)
	C27		510.088	482.575	132.421	PR(10%<Viable<50%)
	T01	TILA-TACE	94.911	87.128	0	CR
	T02		916.823	858.294	151.989	PR(10%<Viable<50%)
	T03		86.541	86.541	16.473	PR(10%<Viable<50%)
	T04		1022.57	1018.48	165.929	PR(10%<Viable<50%)
	T05		686.866	666.226	88.99	PR(10%<Viable<50%)
	T06		289.194	259.571	0	CR
	T07		395.067	395.067	109.526	PR(10%<Viable<50%)
	T08		476.68	441.844	121.27	PR(10%<Viable<50%)
	T09		817.008	714.241	106.194	PR(10%<Viable<50%)
	T10		437.044	437.044	17.633	PR(Viable<10%)
	T11		149.335	134.223	6.156	PR(Viable<10%)
	T12		90.355	90.355	3.484	PR(Viable<10%)
	T13		1328.91	1328.91	0	CR
	T14		795.746	756.248	48.134	PR(Viable<10%)
	T15		97.99	97.99	11.537	PR(10%<Viable<50%)
	T16		430.57	423.24	42.281	PR(Viable<10%)
	T17		202.266	202.266	35.556	PR(10%<Viable<50%)
	T18		100.093	100.093	43.243	PR(10%<Viable<50%)
	T19		59.736	59.736	13.913	PR(10%<Viable<50%)
	T20		135.79	115.283	0	CR
	T21		227.336	225.693	10.562	PR(Viable<10%)
	T22		215.665	202.027	28.041	PR(10%<Viable<50%)
	T23		1224.57	1203.55	0	CR
	T24		386.892	335.983	57.446	PR(10%<Viable<50%)
	T25		364.211	348.771	13.826	PR(Viable<10%)
	T26		93.712	93.712	38.756	PR(10%<Viable<50%)
	T27		174.616	103.56	0	CR
	T28		842.971	842.971	0	CR
	T29		1099.96	1099.96	124.53	PR(10%<Viable<50%)
	T30		311.462	311.462	77.112	PR(10%<Viable<50%)
