# Supplementary material for: A nonrandomized cohort and a randomized study of local control of large hepatocarcinoma by targeting intratumoral lactic acidosis
Source: eLife. 2016 Aug 2;5:e15691. doi: 10.7554/eLife.15691 (PMC4970867; doi:10.7554/eLife.15691)
Supplement: Figure 3—source data 1. [file elife-15691-fig3-data1.xlsx]

## Sheet: Sheet1
	Source file of Figure 3
	Patient No.	Tumor No.	Treatment	Tumor volume before TACE /mL	Viable tumor volume before TACE /mL	Viable tumor volume after TACE/ mL	Viable Tumor residues of each patient /%
	RCT-C01	1	cTACE	236.255	231.025	294.68	127.553
	RCT-C02	2		121.81	120.415	6.545	5.43537
	RCT-C02	3		66.78	66.78	0	0
	RCT-C03	4		966.325	905.22	511.29	56.4824
	RCT-C04	5		892.345	801.265	325.42	40.6133
	RCT-C05	6		327.255	313.125	234.205	74.796
	RCT-C06	7		68.14	62.61	73.9	118.032
	RCT-C07	8		172.685	172.685	6.115	3.54113
	RCT-C08	9		330.48	321.775	37.62	11.6914
	RCT-C09	10		54.585	52.55	11.4	21.6936
	RCT-C10	11		31.655	31.655	2.848	9
	RCT-T01	12	TILA-TACE	25.265	25.265	0	0
	RCT-T02	13		1207.27	1145.92	572.845	49.99
	RCT-T03	14		663.885	549.22	48.959	8.91428
	RCT-T04	15		539.55	483.835	39.51	8.16601
	RCT-T04	16		66.14	63.16	0	0
	RCT-T05	17		31.54	31.54	0	0
	RCT-T06	18		269.635	245.385	11.84	4.82507
	RCT-T07	19		147.76	110.92	0	0
	RCT-T08	20		162.25	154.23	4.663	3.02341
	RCT-T09	21		232.335	215.065	20.092	9.34229
	RCT-T09	22		128.615	128.615	10.39	8.07837
	RCT-T10	23		863.495	863.495	66.945	7.7528
