# Supplementary material for: A nonrandomized cohort and a randomized study of local control of large hepatocarcinoma by targeting intratumoral lactic acidosis
Source: eLife. 2016 Aug 2;5:e15691. doi: 10.7554/eLife.15691 (PMC4970867; doi:10.7554/eLife.15691)
Supplement: Figure 5—source data 1. [file elife-15691-fig5-data1.xlsx]

## Sheet: Sheet1
Source file of Figure 5A					Source file of Figure 5B					Source file of Figure 5C
Patient No.	SurvivalTime/Months	Survival at the cut-off date *			Patient No.	SurvivalTime/Months	Survival at the cut-off date **			Patient No.	SurvivalTime/Months	Survival at the cut-off date **
		TILA-TACE	cTACE				TILA-TACE	cTACE				TILA-TACE	cTACE
T01	39	0			RCT-T01	18	0			T01	39	0
T02	37	0			RCT-T02	20	0			T02	37	0
T03	8	1			RCT-T03	4	1			T03	8	1
T04	38	0			RCT-T04	12	1			T04	38	0
T05	13	1			RCT-T05	16	0			T05	13	1
T06	13	1			RCT-T06	16	0			T06	13	1
T07	18	1			RCT-T07	15	0			T07	18	1
T08	36	0			RCT-T08	15	0			T08	36	0
T09	9	1			RCT-T09	12	1			T09	9	1
T10	15	1			RCT-T10	12	0			T10	15	1
T11	8	1			RCT-C01	4		1		T11	8	1
T12	33	1			RCT-C02	19		0		T12	33	1
T13	32	0			RCT-C04	13		1		T13	32	0
T14	24	0			RCT-C06	4		1		T14	24	0
T15	2	0			RCT-C08	18		0		T15	2	0
T16	41	0			RCT-C10	14		0		T16	41	0
T17	28	0			RCT-C03*	17		0		T17	28	0
T18	6	1			RCT-C05*	16		0		T18	6	1
T19	27	0			RCT-C07*	16		0		T19	27	0
T20	16	0			RCT-C09*	15		0		T20	16	0
T21	29	0			* patients cross over to TILA-TACE					T21	29	0
T22	7	0			** "0"=Live;"1"=dead					T22	7	0
T23	12	0								T23	12	0
T24	25	0								T24	25	0
T25	25	0								T25	25	0
T26	28	0								T26	28	0
T27	24	0								T27	24	0
T28	32	0								T28	32	0
T29	33	0								T29	33	0
T30	8	1								T30	8	1
C01	67		0							RCT-T01	18	0
C02	6		1							RCT-T02	20	0
C03	24		1							RCT-T03	4	1
C04	5		1							RCT-T04	12	1
C05	6		1							RCT-T05	16	0
C06	4		1							RCT-T06	16	0
C07	12		1							RCT-T07	15	0
C08	6		1							RCT-T08	15	0
C09	15		1							RCT-T09	12	1
C10	60		0							RCT-T10	12	0
C11	12		1							RCT-C01	4		1
C12	24		1							RCT-C02	19		0
C13	36		1							RCT-C04	13		1
C14	13		1							RCT-C06	4		1
C15	17		1							RCT-C08	18		0
C16	8		1							RCT-C10	14		0
C17	14		1							RCT-C03*	17		0
C18	5		1							RCT-C05*	16		0
C19	45		0							RCT-C07*	16		0
C20	30		1							RCT-C09*	15		0
C21	48		0							C01	67		0
C22	8		1							C02	6		1
C23	39		0							C03	24		1
C24	7		1							C04	5		1
C25	24		1							C05	6		1
C26	12		1							C06	4		1
C27	36		0							C07	12		1
* "0"=Live;"1"=dead										C08	6		1
										C09	15		1
										C10	60		0
										C11	12		1
										C12	24		1
										C13	36		1
										C14	13		1
										C15	17		1
										C16	8		1
										C17	14		1
										C18	5		1
										C19	45		0
										C20	30		1
										C21	48		0
										C22	8		1
										C23	39		0
										C24	7		1
										C25	24		1
										C26	12		1
										C27	36		0
										* patients cross over to TILA-TACE
										** "0"=Live;"1"=dead
