# Supplementary material for: A nonrandomized cohort and a randomized study of local control of large hepatocarcinoma by targeting intratumoral lactic acidosis
Source: eLife. 2016 Aug 2;5:e15691. doi: 10.7554/eLife.15691 (PMC4970867; doi:10.7554/eLife.15691)
Supplement: Supplementary file 1. [file elife-15691-supp1.xlsx]

## Sheet: SupplementaryTable1
Supplementary File 1. Patient demographics, diagnosis, treatment, and follow-up in cTACE group in the nonrandomized study
Patient No.	Diagnosis																											Treatment times	follow up
	Gender	Age (year)	Diameter of the largest tumor (cm)	Solitary	multiple	multiple foci in two loblule	Vascular invasion	Extrahepatic metastasis	EASL criteria or pathology	Grading (BCLC)	ECOG Score	Child-pugh score	HBV/HCV	HBsAg	HBsAb	HBeAg	HBeAb	HBcAb	HBV-DNA (Copies, *10^3 )	ASH	NASH	Cirrhosis (radiology)	Total bilirubin (μM)	AST (U/L)	ALT (U/L)	Albumin (g/L)	AFP（μg/L）
C01	M	50	11.6	-	+	-			1+2a	B	0	A	+/-	+	-	-	+	+	<1.0	-	-	+	N/A*	N/A*	N/A*	N/A*	>5800	4	CR
C02	M	60	13.5	-	+	-	middle hepatic vein+right hepatic vein	lung metastases	1+2a	C	0	A	+/-	+	-	-	+	+	132	-	-	+	17.265	130	37	31.5	>5800	2	PD ( lung metastasis progression)
C03	M	42	6	-	+	-			1+2a	B	0	A	+/-	+	-	+	-	+	29300	-	-	+	10.2564	35	50	36.8	>5845	3	PR
C04	M	68	14.6	-	+	+		lung metastases	1+2a	C	0	A	+/-	+	-	-	+	+	298	-	-	+	28.3761	150	46	28.4	5	1	PD(new foci in liver)
C05	M	55	13.5	-	+	+		lung metastases	1+2a	C	0	A	+/-	+	-	-	-	+	<1.0	-	-	+	18.6325	79	29	42.3	>5845	3	PD (lung metastasis progression)
C06	M	55	13.7	-	+	-	right branch of portal vein+right hepatic vein	lung metastases	1+2a	C	0	A	+/-	+	-	-	+	+	49.3	-	-	+	20.5128	191	146	31.3	6.3	2	PD(new foci in liver & tumor thrombosis progression）
C07	M	54	6	-	+	-			1+2a	B	0	A	+/-	+	-	-	+	+	2.95	-	-	+	14.359	76	104	35.6	4492.5	3	PD
C08	M	38	13	+	-	-			1+2a	B	0	A	+/-	+	-	-	+	+	161	-	-	+	51.453	230	115	45.3	>50000	3	PD
C09	M	67	5.9	-	+	+			1+2a	B	0	B	+/-	+	-	-	-	+	2.55	-	-	+	39.4872	79	33	37.2	>5800	2	PR
C10	M	53	9.4	-	+	-			1+2a；pathology	B	0	A	+/-	+	-	-	-	+	<1.0	-	-	+	23.9316	77	71	38	N/A*	14	PD(lung metastasis+ abdominal cavity metastasis; foci was surgically removed )
C11	M	38	9.1	-	+	+		ischium+pubis+ilium bone metastases	1+2a；pathology	C	1	A	+/-	-	+	-	-	-	<1.0	-	-	+	14.8718	97	96	38.9	>10000	2	PD(new foci in liver)
C12	M	39	6.3	-	+	-			1+2a；pathology	B	0	A	+/-	+	-	-	+	+	2.77	-	-	+	15.8	42	28	45.6	851.8	6	PD(new foci in liver; foci was surgically removed)
C13	M	49	11.1	-	+	-			1+2a	B	0	A	+/-	+	-	-	+	+	<1.0	-	-	+	25.9	91	191	37.8	138.3	2	SD
C14	M	37	11.8	-	+	+			1+2a	B	0	A	+/-	+	-	-	+	+	<1.0	-	-	+	20.7	125	31	49.4	>10000	2	PD
C15	M	53	5.1	-	+	+			1+2a	B	0	A	+/-	+	-	-	+	+	1.44	-	-	+	24.9	56	45	33.7	3364.7	3	PD(new foci in liver)
C16	M	52	13	-	+	-			1+2a	B	0	A	+/-	+	-	-	+	+	<1.0	-	-	+	11.8	33	36	32.9	40.5	2	PD (metastasis in lung)
C17	M	46	10.9	-	+	+			1+2a	B	0	A	+/-	+	-	-	+	+	110	-	-	+	22.9	56	35	38.7	>10000	2	PD(new foci in liver)
C18	M	59	10.3	-	+	+			1+2a；pathology	B	0	A	+/-	+	-	-	+	+	<1.0	-	-	+	26	31	123	36.1	180.6	3	PD（liver lesion progression+right portal vein tumor thrombus）
C19	M	51	10	-	+	+		lung metastases	1+2a	C	0	A	+/-	+	-	-	+	+	295	-	-	+	15	158	88	39.8	209.1	2	PD (increased lung metastasis)
C20	M	48	12.2	-	+	-	posterior branch of right portal vein	humerus+rib+lumbar vertebral bone metastases+retroperitoneallymph node metastases	1+2a；pathology	C	1	A	+/-	-	+	-	+	+	<1.0	-	-	+	14.0171	24	20	43.2	4.6	5	PD（rib+lumbar vertebral bone metastases progression）
C21	M	81	8.6	+	-	-			2a	B	0	A	-/-	-	+	-	-	-	<1.0	-	-	+	4.78632	29	74	29.7	1.1	6	PR
C22	M	75	6.9	-	+	+			1+2a	B	0	B	+/-	+	-	-	+	+	<1.0	-	-	+	24.3	62	71	31.2	2635	2	PR
C23	M	54	5	+	-	-			1+2a	B	0	A	+/-	-	-	-	+	+	<1.0	-	-	+	15.4	27	20	40.2	200.4	2	PD（right portal vein tumor thrombus）
C24	M	68	7	-	+	-	posterior branch of right portal vein		1+2a	C	0	A	-/-	-	+	-	-	-	<1.0	-	-	+	52.5	100	96	31.6	>10000	2	PD(new foci in liver+right portal vein tumor thrombus progression)
C25	M	39	12.5	-	+	+			1+2a	B	0	A	+/-	+	-	-	+	+	<1.0	-	-	+	32.1	113	95	42.6	391.5	7	PD (new foci in liver & lung metastasis)
C26	M	42	6	-	+	+			1+2a	B	0	A	+/-	+	-	-	+	+	<1.0	-	-	+	10	39	34	36.9	3444.7	5	PD (metastasis in lung)
C27	M	76	12.3	-	+	-		lung metastases	1+2a	C	0	A	+/-	+	-	-	-	+	<1.0	-	-	+	29.3	42	37	37.1	88.1	3	PD (increased lung metastasis)
*N/A not available.
