# Supplementary material for: A nonrandomized cohort and a randomized study of local control of large hepatocarcinoma by targeting intratumoral lactic acidosis
Source: eLife. 2016 Aug 2;5:e15691. doi: 10.7554/eLife.15691 (PMC4970867; doi:10.7554/eLife.15691)
Supplement: Supplementary file 2. [file elife-15691-supp2.xlsx]

## Sheet: Sheet1
Supplementary File 2. Patient demographics, diagnosis, treatment, and follow-up in TILA-TACE group in the nonrandomized study
Patient No.	Diagnosis																											Treatment times	follow up
	Gender	Age (year)	Diameter of the largest tumor (cm)	Solitary	multiple	multiple foci in two loblule	Vascular invasion	Extrahepatic metastasis	EASL criteria or pathology	Grading (BCLC)	ECOG Score	Child-pugh score	HBV/HCV	HBsAg	HBsAb	HBeAg	HBeAb	HBcAb	HBV-DNA(Copies, *10^3 )	ASH	NASH	Cirrhosis (radiology)	Total bilirubin (μM)	AST (U/L)	ALT (U/L)	Albumin (g/L)	AFP （mg/L）
T01	M	80	6	+	-	-			1+2a	B	0	A	-/-	-	+	-	-	-	<1.0	-	-	+	19.2	39	48	40.1	14.8	6	PD(new foci in liver)
T02	M	54	13	-	+	-			1+2a	B	0	A	+/-	+	+	-	-	-	<1.0	-	-	+	5.5	36	42	37.8	10.3	8	CR
T03	M	79	5.6	+	-	-			1+2a；pathology	B	0	A	-/-	-	+	-	-	-	<1.0	-	-	+	18.5	37	35	39.5	141.1	2	PR
T04	M	61	13.6	-	+	-	right branch of portal vein		1+2a	C	0	A	+/-	-	+	-	-	-	1.16	-	-	+	10.7	59	27	38.4	>10000	4	CR
T05	M	47	11.3	-	+	-	right branch of portal vein+right hepatic vein		1+2a	C	0	A	+/-	+	-	+	-	+	3.55	-	-	+	40.7	88	71	36.5	269.5	4	PD(new foci in liver)
T06	M	63	8	-	+	+			1+2a	B	0	A	+/-	+	-	-	+	+	2.56	-	-	+	28.1	63	33	35.8	48.1	3	PD(new foci in liver)
T07	M	58	11	+	-	-			1+2a	B	0	A	-/-	-	-	-	-	-	<1.0	-	-	+	13.1	67	40	41.5	487.1	3	PD(new foci in liver)
T08	M	36	11.2	-	+	+		femur bone metastases	1+2a	C	0	A	+/-	+	-	-	+	+	2.87	-	-	+	17.5	56	53	46	>10000	13	PD(metastasis in bone)
T09	M	32	12.6	-	+	+			1+2a	B	0	A	+/-	+	-	-	+	+	<1.0	-	-	+	14.8	44	32	43.4	456	3	PD(new foci in liver)
T10	M	58	8.8	-	+	+		lung metastases	1+2a	C	0	A	+/-	+	-	-	-	+	40.7	-	-	+	12.8	201	62	31.9	10	2	PD(new foci in liver)
T11	M	47	6.8	-	+	-		hepatic hilar lymph node metastases	1+2a	C	0	A	+/-	+	-	-	-	+	<1.0	-	-	+	9.3	25	25	37.2	7	3	PD(new foci in liver)
T12	M	61	6.3	-	+	-			1+2a	B	0	A	+/-	+	-	-	+	+	<1.0	-	-	+	27.3	61	23	35.4	113.4	4	PD(new foci in liver)
T13	M	34	11	+	-	-			1+2a	B	1	B	+/-	+	-	-	-	+	11.5	-	-	+	38.3	578	463	37.6	292.6	4	CR
T14	M	46	12.7	+	-	-		lung metastases+lumbar vertebral bone metastases	1+2a	C	0	A	-/-	-	+	-	-	-	<1.0	-	-	+	5.2	41	51	38.6	9.2	4	PD(metastasis in lung)
T15	M	81	7.5	+	-	-	right branch of portal vein	hepatic hilar lymph node metastases	1+2a	C	0	A	-/-	-	-	-	-	-	<1.0	-	-	+	7.3	55	58	38.3	9	1	PD(metastasis in lung)
T16	F	38	9.6	+	-	-			1+2a	B	0	A	+/-	+	-	-	+	+	<1.0	-	-	+	12.2	79	33	39.1	20	6	PD(new foci in liver)
T17	M	46	8.3	-	+	+		hepatic hilar lymph node metastases	1+2a	C	0	A	+/-	+	-	-	+	+	425	-	-	+	13.1	54	73	35.5	87.3	8	PD(metastasis in lung)
T18	M	65	5.8	-	+	+			1+2a	B	0	A	+/-	+	-	+	-	+	1250	-	-	+	24.2	57	31	30.2	>10000	2	PD(new foci in liver)
T19	M	58	5.3	+	-	-			1+2a	B	0	A	+/-	+	-	-	+	+	<1.0	-	-	+	22.3	28	19	38	42.6	6	PR
T20	M	64	6.1	-	+	-			1+2a	B	0	B	+/-	+	-	-	+	+	<1.0	-	-	+	19.6	36	27	67.4	11.6	5	PR
T21	M	43	8	+	-	-			1+2a	B	0	A	+/-	+	-	-	-	+	1240	-	-	+	16.6	38	28	33.5	12.6	6	PR
T22	M	77	6.3	-	+	-			1+2a	B	0	A	+/-	-	+	-	+	+	<1.0	-	-	+	8.9	34	15	41.8	2.9	3	PR
T23	M	62	7.8	-	+	-	right branch of portal vein	hepatic hilar lymph node metastases	1+2a	C	0	B	+/-	+	-	+	-	+	255	-	-	+	18.5	97.3	61	30.5	>10000	2	PD(new foci in liver)
T24	M	53	10	+	-	-			1+2a	B	0	A	+/-	+	-	+	-	+	1940	-	-	+	11.3	63	55	37.5	75.2	2	CR
T25	M	64	10	+	-	-			1+2a	B	0	A	+/-	+	-	-	+	+	<1.0	-	-	+	18.6	43	26	44.9	250.2	3	CR
T26	F	75	5	+	-	-			1+2a；pathology	B	0	A	-/-	-	+	-	-	-	<1.0	-	-	+	5.4	27	18	46.6	92.6	5	CR（foci was surgically removed）
T27	M	36	10.3	-	+	+			1+2a；pathology	B	0	A	+/-	+	-	-	+	+	8.03	-	-	+	12.2	70	63	41.2	>10000	1	CR（foci was surgically removed）
T28	M	55	12.2	+	-	-			1+2a；pathology	B	0	A	+/-	+	-	-	+	+	<1.0	-	-	+	6.8	40	29	36.4	7218.6	1	CR（foci was surgically removed）
T29	M	66	13.2	+	-	-		hepatic hilar lymph node metastases	1+2a；pathology	C	0	A	+/-	+	-	-	+	+	<1.0	-	-	+	32.5	48	27	30.6	>10000	1	CR（foci was surgically removed）
T30	F	58	10	-	+	+	right branch of portal vein		1+2a	C	0	A	+/-	+	-	-	+	+	1.15	-	-	+	18	72	30	40.9	9.9	3	PD(new foci in liver & metastasis in lung)
