# Supplementary material for: A nonrandomized cohort and a randomized study of local control of large hepatocarcinoma by targeting intratumoral lactic acidosis
Source: eLife. 2016 Aug 2;5:e15691. doi: 10.7554/eLife.15691 (PMC4970867; doi:10.7554/eLife.15691)
Supplement: Supplementary file 3. [file elife-15691-supp3.xlsx]

## Sheet: Sheet1
Supplementary table 3. Patient demographics, diagnosis, treatment, and follow-up in RCT
Patient No.	Diagnosis																											Treatment			follow up
	Gender	Age (year)	Diameter of the largest tumor (cm)	Solitary foci	multiple foci	multiple foci in two loblule	Vascular invasion	Extrahepatic metastasis	EASL criteria or pathology	Grading (BCLC)	ECOG Score	Child-pugh score	HBV/HCV	HBsAg	HBsAb	HBeAg	HBeAb	HBcAb	HBV-DNA(Copies, *10^3 )	ASH	NASH	Cirrhosis (radiology)	Total bilirubin (μM)	AST (U/L)	ALT (U/L)	Albumin (g/L)	AFP（mg/L）	Treatment modality	Treatment times	Cross-over
RCT-T-01	M	55	6	+	-	-			1+2a	B	0	A	+/-	+	-	-	+	+	2.09	-	-	+	12.4	72	91	42	4485	TILA-TACE	3		CR
RCT-T-02	F	42	12.8	-	+	-			pathology	B	1	A	+/-	-	-	-	-	+	＜1.0	-	-	+	20.4	27	20	40.2	201.2	TILA-TACE	9		PR
RCT-T-03	M	40	13.5	-	+	+			1+2a	B	1	A	+/-	+	-	+	-	+	584	-	-	+	14.6	46	29	34.2	8.3	TILA-TACE	2		PD(new foci in liver)
RCT-T-04	M	73	9.4	-	+	+			1+2a	B	0	A	+/-	+	-	-	+	+	98.4	-	-	+	45	59	42	36.4	248.4	TILA-TACE	10		PD(hemobilia)
RCT-T-05	M	58	5	-	+	+			1+2a	B	0	A	+/-	+	-	-	-	+	＜1.0	-	-	+	13.3	39	28	37.2	3148	TILA-TACE	6		PD(new foci in liver)
RCT-T-06	M	48	8.7	+	-	-			1+2a	B	0	A	+/-	+	-	-	+	+	438	-	-	+	10.3	84	126	44	56.6	TILA-TACE	6		PR
RCT-T-07	M	67	6.3	-	+	-		hepatic hilar lymph node metastases	1+2a	C	0	A	+/-	+	-	-	-	+	11600	-	-	+	15	37	22	36.7	6.2	TILA-TACE	1		CR
RCT-T-08	M	86	7	+	-	-			2a	B	0	A	-/-	-	-	-	-	-	＜1.0	-	-	+	13.6	35	31	36.7	2.2	TILA-TACE	2		PD(new foci in liver)
RCT-T-09	M	75	7	-	+	-	right branch of portal vein		1+2a	C	0	A	+/-	+	-	-	+	+	306	-	-	+	15.5	68	61	41.9	6225	TILA-TACE	3		PD(new foci in liver)
RCT-T-10	M	58	12.4	-	+	+	left branch of portal vein		1+2a	C	0	A	+/-	+	-	-	+	+	＜1.0	-	-	+	12.2	181	156	37.8	9.3	TILA-TACE	4		PR
RCT-C-01	F	52	10.2	+	-	-	right branch of portal vein	retroperitoneal lymph node metastases	1+2a	C	1	A	+/-	+	-	-	+	+	19.9	-	-	+	26.2	43	16	37.9	2888	cTACE	1		PD(tumor thrombosis+extrahepatic lymph node metastasis)
RCT-C-02	M	70	5.3	-	+	+			1+2a	B	0	A	-/-	-	+	-	-	-	＜1.0	-	+	+	30.8	95	103	34	33	cTACE	3		PD(new foci in liver)
RCT-C-03	F	43	13	-	+	-			1+2a	B	0	A	+/-	+	-	-	+	+	＜1.0	-	-	+	12	41	25	47.3	14872	cTACE	6	cross-over to TILA-TACE, then bridged to surgical resection	PD(new foci in liver)
RCT-C-04	F	81	12	+	-	-			2a+3	B	0	A	-/-	-	-	-	-	-	＜1.0	-	-	+	16.1	55	7	40.5	4667.3	cTACE	2		PD（new foci in liver+scapula bone metastases）
RCT-C-05	M	51	9.2	-	+	-			1+2a	B	0	A	+/-	+	-	-	+	+	17.4	-	-	+	19.1	59	46	28.4	2.7	cTACE	4	cross-over to TILA-TACE, then bridged to surgical resection	PR (accepted liver operation)
RCT-C-06	M	53	6.7	-	+	-			1+2a	B	0	A	+/-	-	+	-	-	+	＜1.0	-	-	+	21	65	30	35.1	348	cTACE	2		PD(new foci in liver)
RCT-C-07	M	53	7.5	+	-	-			1+2a	B	0	A	+/-	+	-	-	+	+	1.45	-	-	+	11.9	39	58	41.6	12.3	cTACE	3	cross-over to TILA-TACE, then bridged to surgical resection	PD(new foci in liver)
RCT-C-08	M	48	7.4	-	+	+		brain metastasis	1+2a	C	2	A	+/-	+	-	-	+	+	277	-	-	+	14.4	50	68	41.9	11261.5	cTACE	2		PD（brain metastasis and bone metastases progression）
RCT-C-09	M	67	5.7	+	-	-			1+2a	B	0	A	+/-	+	-	-	+	+	＜1.0	-	-	+	8.5	58	47	37.6	33.3	cTACE	4	cross-over to TILA-TACE	PR
RCT-C-10	M	76	5	+	-	-			1+2a	B	0	A	+/-	-	-	-	+	+	＜1.0	-	-	+	7	23	10	36.5	20.1	cTACE	3		CR
