# Supplementary material for: A nonrandomized cohort and a randomized study of local control of large hepatocarcinoma by targeting intratumoral lactic acidosis
Source: eLife. 2016 Aug 2;5:e15691. doi: 10.7554/eLife.15691 (PMC4970867; doi:10.7554/eLife.15691)
Supplement: Supplementary file 4. [file elife-15691-supp4.xlsx]

## Sheet: SupplementaryTable4
Supplemetary File 4. Sample size calculation.
Power (1-β)	n1	n2	γ	α	β	μ1(%)	μ2(%)	σ1(%)	σ2(%)
			(n1/n2)
0.53622	5	5	1	0.05	0.46378	66.53	12.61	57.57	11.92
0.61279	6	6	1	0.05	0.38721	66.53	12.61	57.57	11.92
0.6796	7	7	1	0.05	0.3204	66.53	12.61	57.57	11.92
0.737	8	8	1	0.05	0.263	66.53	12.61	57.57	11.92
0.78567	9	9	1	0.05	0.21433	66.53	12.61	57.57	11.92
0.82647	10	10	1	0.05	0.17353	66.53	12.61	57.57	11.92
0.86034	11	11	1	0.05	0.13966	66.53	12.61	57.57	11.92
0.88822	12	12	1	0.05	0.11178	66.53	12.61	57.57	11.92
0.91099	13	13	1	0.05	0.08901	66.53	12.61	57.57	11.92
0.92945	14	14	1	0.05	0.07055	66.53	12.61	57.57	11.92
0.94432	15	15	1	0.05	0.05568	66.53	12.61	57.57	11.92
n1, n2 represent the number of patients receiving cTACE and TILA-TACE.
μ1 and σ1 are the mean viable residual and corresponding standard deviation after cTACE treatment.
μ2 and σ2 are presumed mean viable residual and corresponding standard deviation after bTACE treatment.
